# Supplementary material for: Epigenetic inactivation of the autophagy–lysosomal system in appendix in Parkinson’s disease
Source: PubMed Central journal article supplement (PMC8390554; doi:10.1038/s41467-021-25474-x), 2021-08-26
Supplement: 41467_2021_25474_MOESM3_ESM.pdf [file 41467_2021_25474_MOESM3_ESM.pdf]

## Description of Additional Supplementary Files

**Supplementary Data 1:** DNA methylation changes in the appendix of PD patients relative to controls.

**Supplementary Data 2:** Differentially expressed ALP genes in the appendix of PD patients relative to controls.

**Supplementary Data 3:** DNA methylation changes in the olfactory bulb of PD patients relative to controls.

**Supplementary Data 4:** DNA methylation changes in the prefrontal cortex neurons of PD patients relative to controls, primary cohort.

**Supplementary Data 5:** DNA methylation changes in prefrontal cortex neurons with PD Braak stage.

**Supplementary Data 6:** DNA methylation changes in the prefrontal cortex neurons of PD patients relative to controls, replication cohort.

**Supplementary Data 7:** ALP genes consistently epigenetically disrupted across the PD appendix and brain.

**Supplementary Data 8:** Quantitative proteomics analysis of the PD appendix.

**Supplementary Data 9:** Quantitative proteomic analysis of the PD prefrontal cortex.

**Supplementary Data [10](#):** TMT quantitative proteomic analysis of the PD appendix.

**Supplementary Data 11:** DNA methylation changes with age in appendix of healthy individuals and PD patients.

**Supplementary Data 12:** DNA methylation changes with age in prefrontal cortex neurons of healthy individuals and PD patients.

**Supplementary Data 13:** DNA methylation changes with age in olfactory bulb of healthy individuals and PD patients.

**Supplementary Data 14:** ALP genes consistently epigenetically altered with age in the healthy appendix and healthy prefrontal cortex neurons.

**Supplementary Data 15:** DNA methylation changes in the cecal patch in response to gut inflammation: wild-type and A30P  $\alpha$ -syn mice chronically treated with DSS or water.

**Supplementary Data 16:** DNA methylation changes in the cecal patch induced by rAAV vector-mediated  $\alpha$ -syn aggregation in mice.

**Supplementary Data 17:** Enrichment of genes with significantly differentially modified cytosines and the dominant direction of modification.

**Supplementary Data 18:** Demographic and clinical information for human samples.

**Supplementary Data 19:** Padlock probe libraries and study primers.

**Supplementary Data 20:** DNA methylation changes with age in appendix of healthy individuals and PD patients restricted to those above 62 years of age.

**Supplementary Data 21:** Test estimates and p values used to produce figures 1c, 1d, 2c, 4b, 5b, 5c and Supplementary figure 19.
